# Supplementary material for: Biocompatible amphiphilic hyperbranched nanocapsules with a functional core: Synergistic encapsulation and asynchronous release properties towards multi-guest molecules
Source: Royal Society of Chemistry journal article supplement (doi:10.1039/c2ra21333h), 2012-01-01
Supplement: c2ra21333h.pdf [file c2ra21333h.pdf]

## Electronic Supplementary Information

# Biocompatible amphiphilic hyperbranched nanocapsules with a functional core: Synergistic encapsulation and asynchronous release properties towards multi-guest molecules

Wei Tian<sup>a\*</sup>, Anlin Lv<sup>b\*</sup>, Yunchuan Xie<sup>c</sup>, Xiaoying Wei<sup>a</sup>, Bowu Liu<sup>b</sup>, Xiaoyan Lv<sup>a</sup>

<sup>a</sup> *The Key Laboratory of Space Applied Physics and Chemistry, Ministry of Education and Shaanxi Key Laboratory of Macromolecular Science and Technology, School of Science, Northwestern Polytechnical University, Xi'an, 710072, P. R. of China*

<sup>b</sup> *Department of Cardiology, Xijing Hospital, Fourth Military Medical University, Xi'an, 710032, P. R. of China*

<sup>c</sup> *Department of Applied Chemistry, School of Science, Xi'an Jiaotong University, Xi'an, 710049, P. R. of China*

---

\*Corresponding Author, E-mail Address: happytw\_3000@163.com (W. Tian), lvanlin@yahoo.com.cn (A. L. Lv) Tel: +86-29-88431619, Fax: +86-29-88431619

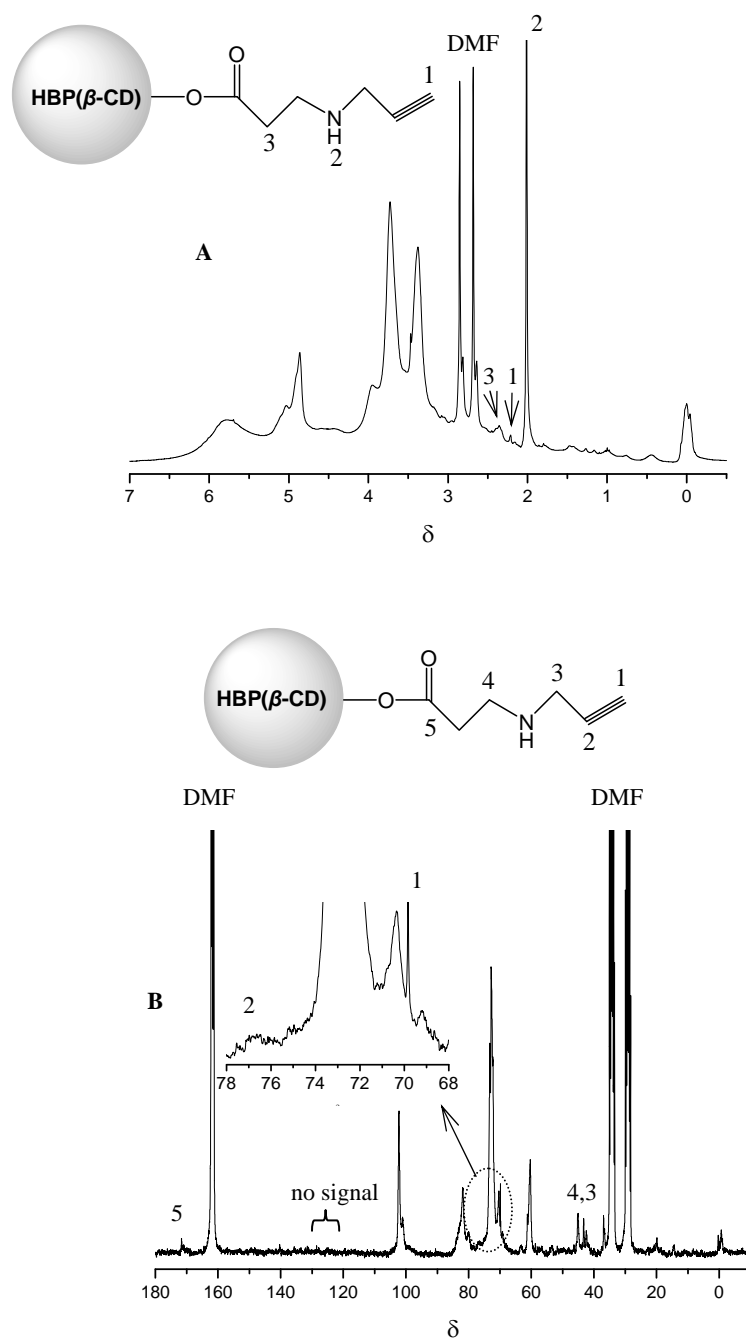

**Figure S1.**  $^1\text{H}$  NMR (A) and  $^{13}\text{C}$  NMR (B) spectra of HBP( $\beta$ -CD)-C $\equiv$ CH

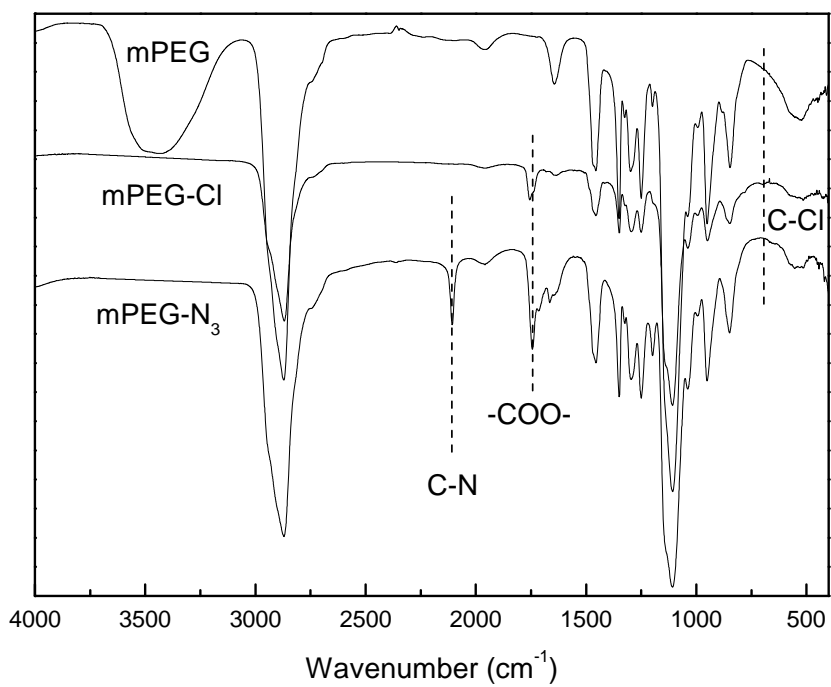

**Figure S2.** FTIR spectra of MPEG, MPEG-Cl and MPEG-N<sub>3</sub>

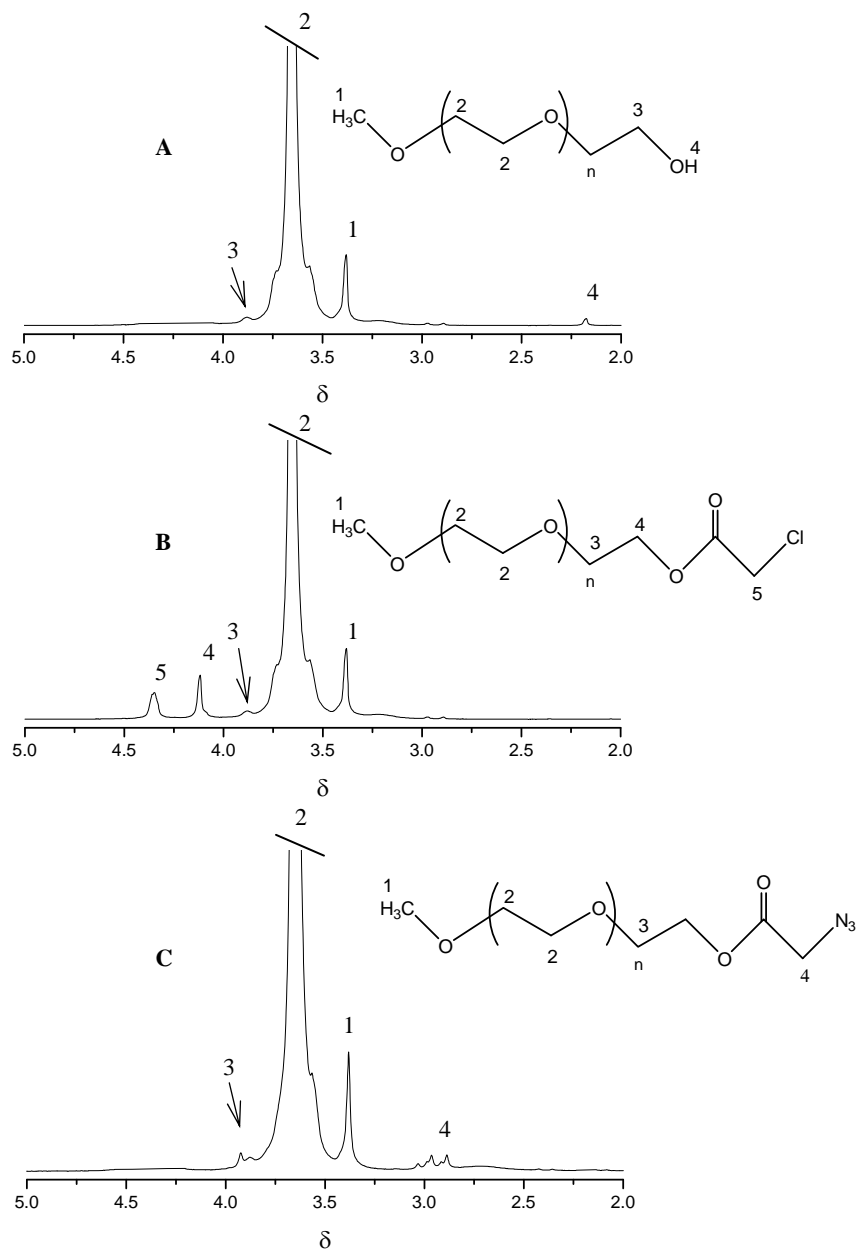

**Figure S3.**  $^1\text{H}$  NMR spectra of MPEG (A), MPEG-Cl (B) and MPEG-N<sub>3</sub> (C)

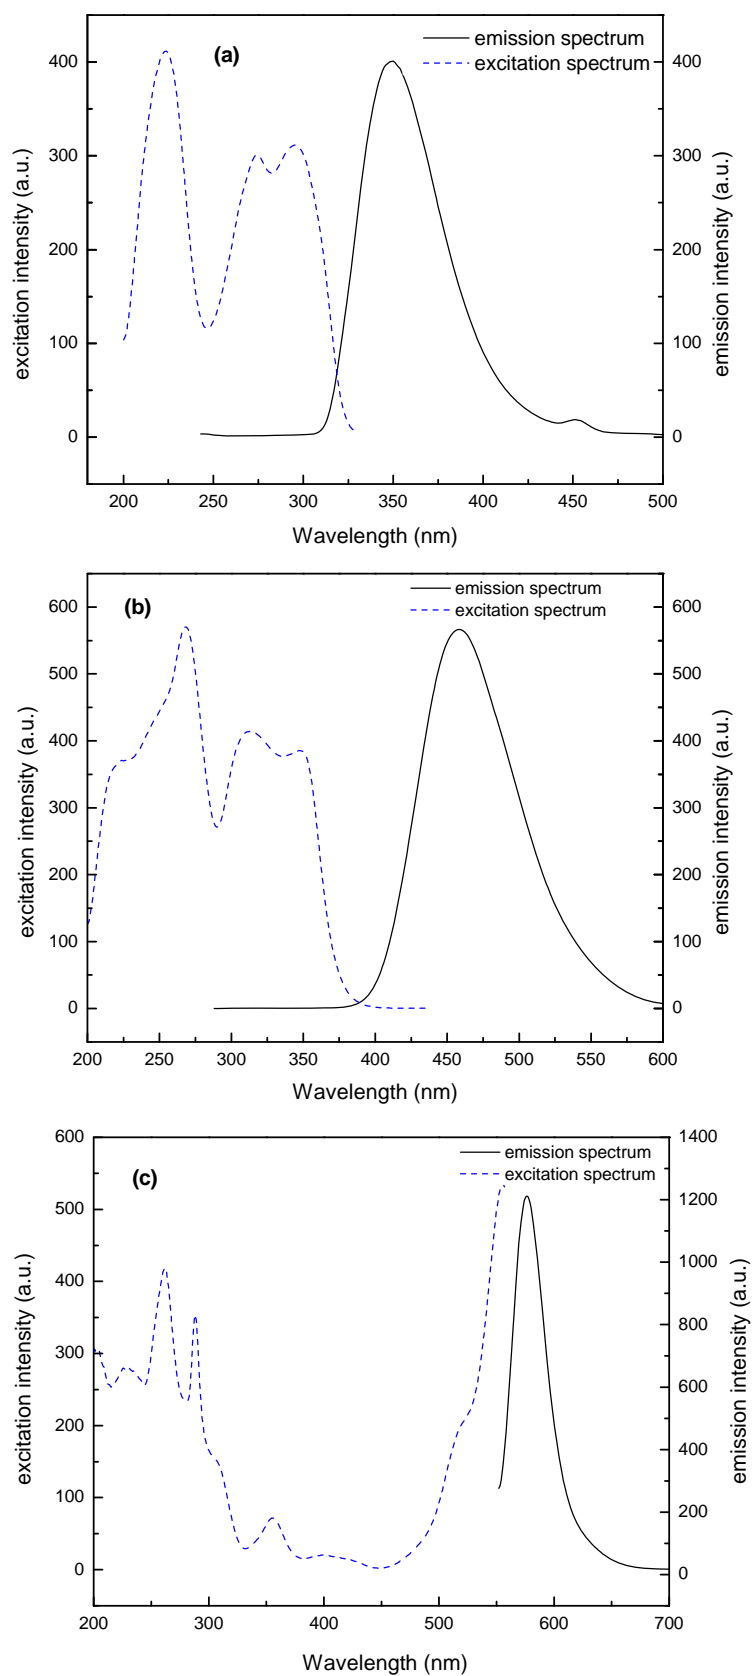

**Figure S4.** Fluorescence excitation and emission spectra of LND (a), LL (b) and RhB (c) in aqueous solution

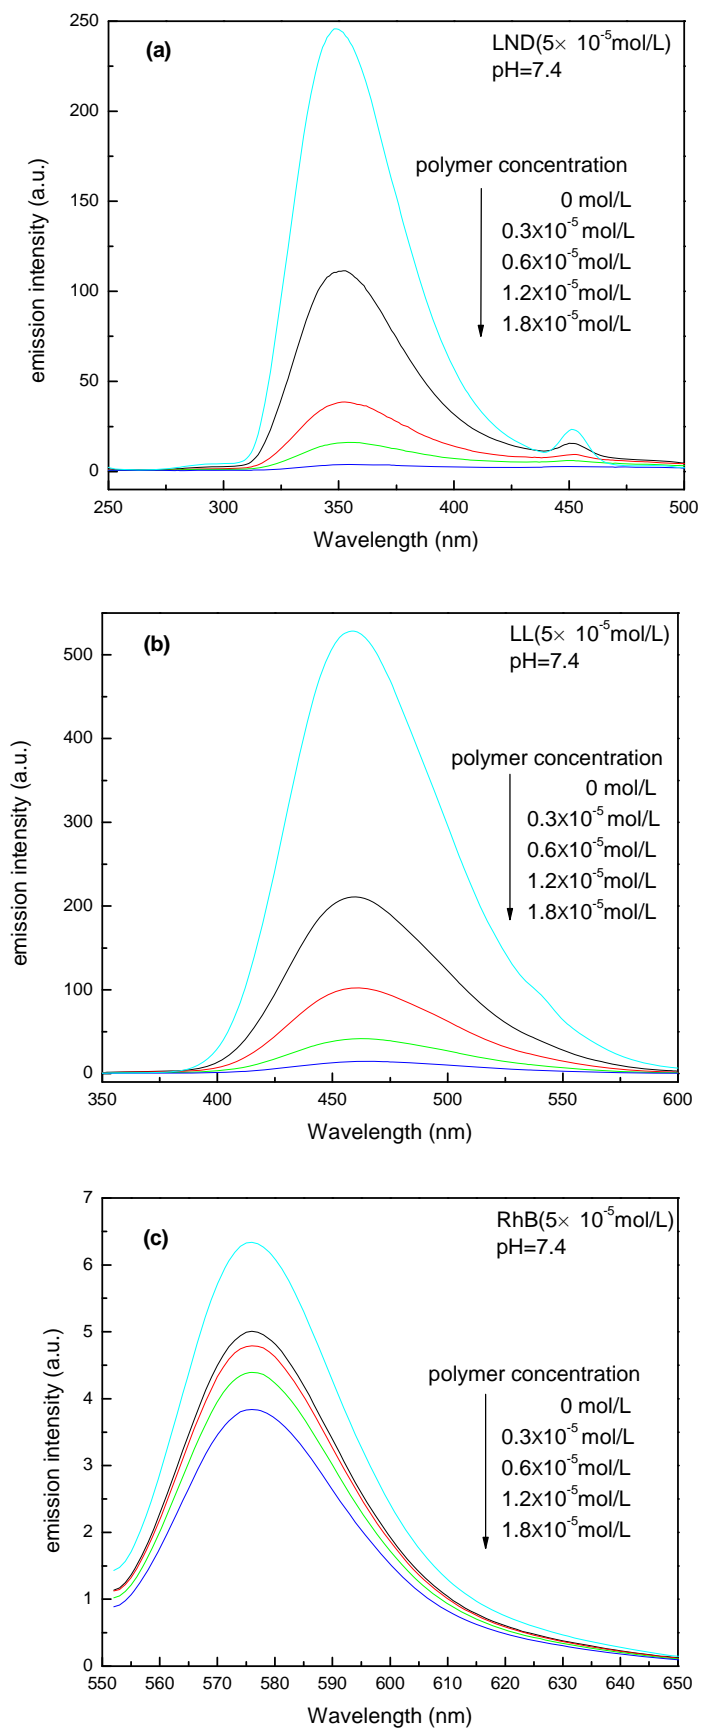

**Figure S5.** Fluorescence emission spectra of LND (a), LL (b) and RhB (c) solution in the presence of AHN at pH=7.4
